# Supplementary material for: Early detection of structural abnormalities and cytoplasmic accumulation of TDP-43 in tissue-engineered skins derived from ALS patients
Source: Springer Nature journal article supplement (doi:10.1186/s40478-014-0181-z), 2015-01-30

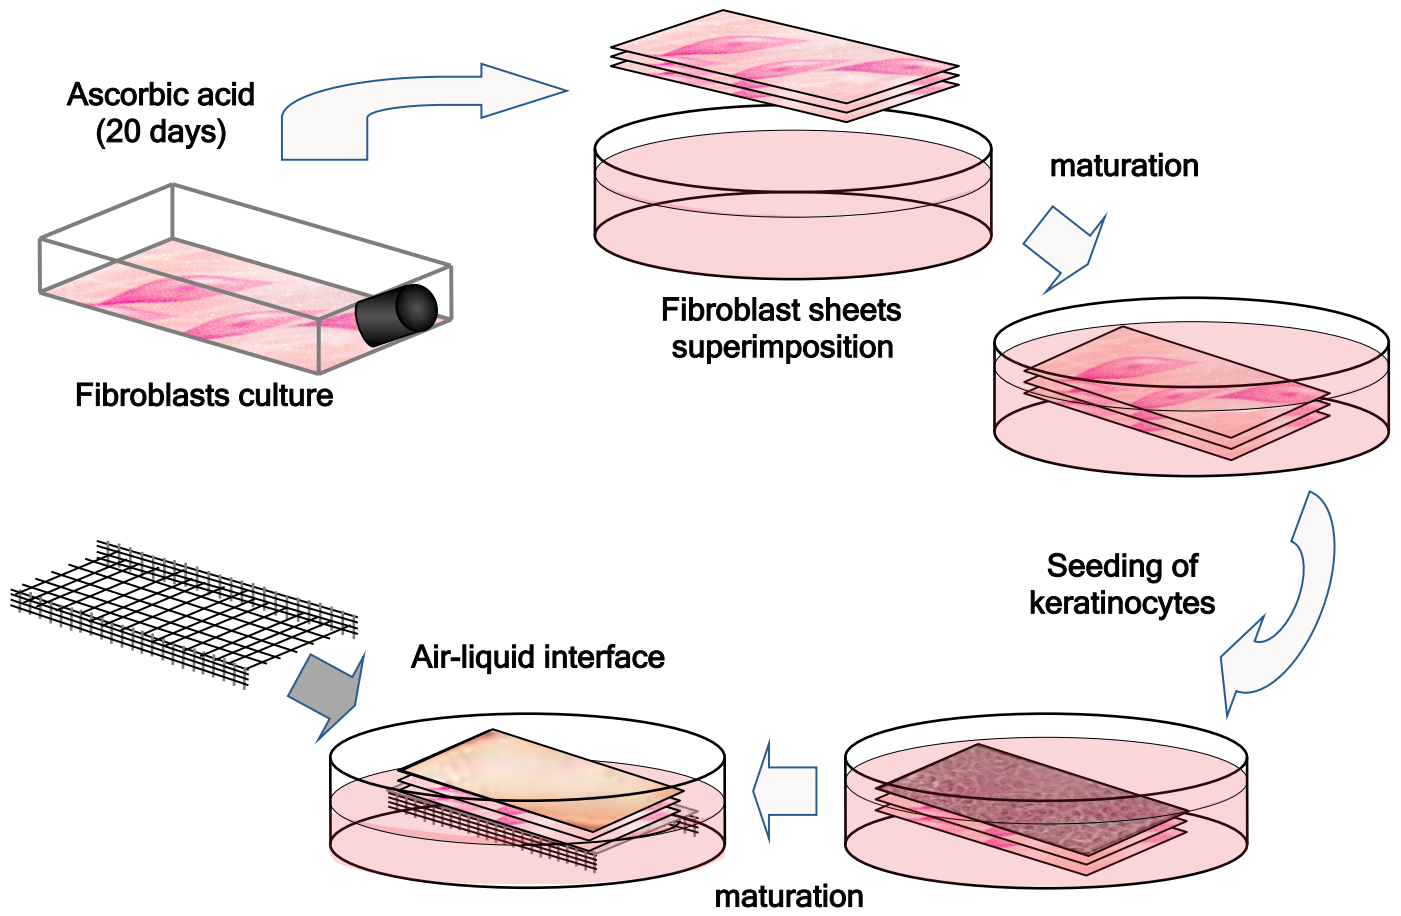

Supplement: MOESM3 [file 25665676]
