# Supplementary material for: Early detection of structural abnormalities and cytoplasmic accumulation of TDP-43 in tissue-engineered skins derived from ALS patients
Source: Springer Nature journal article supplement (doi:10.1186/s40478-014-0181-z), 2015-01-30
Supplement: MOESM4 [file 25665676]

**Additional Table 2: Abnormal structural skin features detected in ALS-tissue engineered skin**

| <b>ID number</b> | <b>Undifferentiated epidermis</b> | <b>Cohesive failure of the <i>stratum corneum</i></b> | <b>Abnormal dermo-epidermal junction</b> | <b>Delamination</b> | <b>Keratinocyte infiltration</b> | <b>Collagen misornization</b> |
|------------------|-----------------------------------|-------------------------------------------------------|------------------------------------------|---------------------|----------------------------------|-------------------------------|
| SALS 1           | x                                 | x                                                     | x                                        | x                   | x                                | x                             |
| SALS 2           | x                                 | x                                                     | x                                        | x                   |                                  | x                             |
| SALS 3           | x                                 |                                                       | x                                        | x                   |                                  | x                             |
| SALS 4           | x                                 | x                                                     | x                                        | x                   |                                  | x                             |
| SALS 5           | x                                 |                                                       | x                                        | x                   | x                                | x                             |
| SALS 6           | x                                 |                                                       | x                                        | x                   | x                                | x                             |
| C9-S000005       | x                                 | x                                                     | x                                        | x                   | x                                | x                             |
| C9-S000008       | x                                 | x                                                     | x                                        | x                   | x                                | x                             |
| C9-S000009       | x                                 | x                                                     | x                                        | x                   | x                                | x                             |
| C9-S000012       | x                                 | x                                                     | x                                        | x                   | x                                | x                             |
| C9-S000013       | x                                 | x                                                     | x                                        | x                   | x                                | x                             |
| C9-S000014       | x                                 | x                                                     | x                                        | x                   | x                                | x                             |
