# Supplementary material for: Early detection of structural abnormalities and cytoplasmic accumulation of TDP-43 in tissue-engineered skins derived from ALS patients
Source: Springer Nature journal article supplement (doi:10.1186/s40478-014-0181-z), 2015-01-30

a)

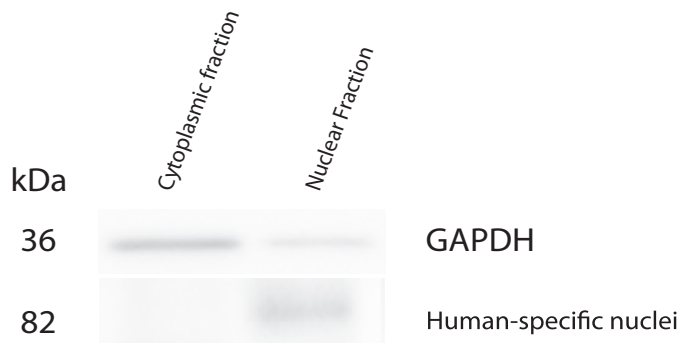

b)

2D-Fibroblasts culture (cytoplasmic fraction)      2D-Fibroblasts culture (nuclear fraction)

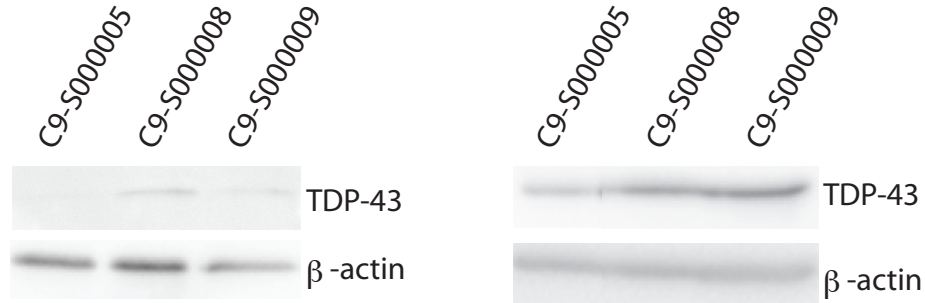

TES's cytoplasmic fraction

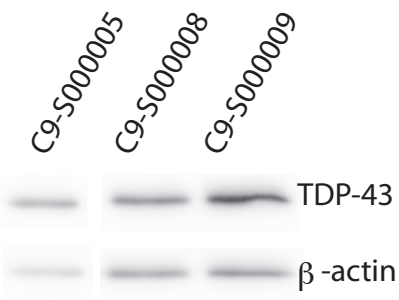

TES's nuclear fraction

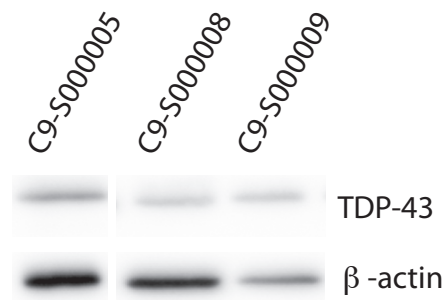

TES's cytoplasmic fraction

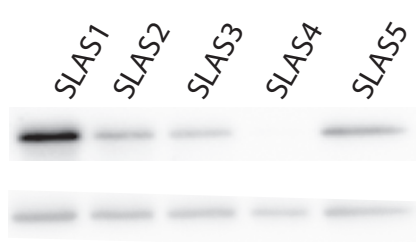

TES's nuclear fraction

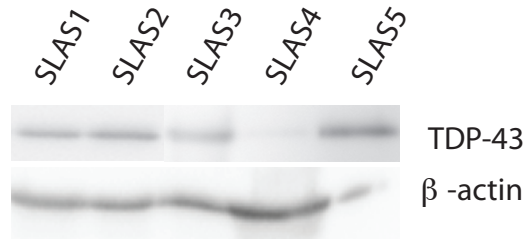

Supplement: MOESM6 [file 25665676]
